# Supplementary material for: High-throughput metabolic screening of microalgae genetic variation in response to nutrient limitation
Source: PubMed Central journal article supplement (PMC4644200; doi:10.1007/s11306-015-0878-4), 2015-11-13
Supplement: 11306_2015_878_MOESM1_ESM.pdf [file 11306_2015_878_MOESM1_ESM.pdf]

## Supplementary information

### High-throughput metabolic screening of microalgae genetic variation in response to nutrient limitation

Amit K. Bajhaiya<sup>1,a</sup>, Andrew P. Dean<sup>1,2,a</sup>, Thomas Driver<sup>1</sup>, Drupad K. Trivedi<sup>3</sup>, Nicholas J. W. Rattray<sup>3</sup>, J. William Allwood<sup>3,4</sup>, Royston Goodacre<sup>3</sup>, Jon K. Pittman<sup>1\*</sup>

<sup>1</sup>Faculty of Life Sciences, The University of Manchester, Michael Smith Building, Oxford Road, Manchester M13 9PT, UK

<sup>2</sup>Department of Geography, University of Sheffield, Sheffield S10 2TN, UK

<sup>3</sup>School of Chemistry, Manchester Institute of Biotechnology, The University of Manchester, 131 Princess Street, Manchester M1 7DN, UK

<sup>4</sup>Environmental & Biochemical Sciences Group, The James Hutton Institute, Invergowrie, Dundee DD2 5DA, Scotland UK

<sup>a</sup>These authors contributed equally to the paper

\*Corresponding author: Dr Jon Pittman, Faculty of Life Sciences, University of Manchester, Michael Smith Building, Oxford Road, Manchester M13 9PT, UK; Tel: +44 (0)161 275 5235; Fax: +44 (0)161 275 5082; Email: [jon.pittman@manchester.ac.uk](mailto:jon.pittman@manchester.ac.uk)

#### This file includes eight supplementary figures and two supplementary tables:

**Supplementary Figure 1.** Representative EMSC-corrected FT-IR spectra from wild type cultured in replete and limiting P and N conditions after seven days.

**Supplementary Figure 2.** PLS scores plot of FT-IR spectra derived from wild type cells cultured in nutrient replete conditions in comparison to cells cultured in response to P limitation and N limitation after seven days of growth.

**Supplementary Figure 3.** Physiological responses of wild type and mutant strains in response to P and N limitation.

**Supplementary Figure 4.** PLS scores plot of FT-IR spectra derived from wild type, *snrk2.1* and/or *snrk2.2* mutants and *psr1*-containing mutants (*psr1* type strains).

**Supplementary Figure 5.** PC-DFA of LC-MS data from wild type and mutant strains in response to P limitation.

**Supplementary Figure 6.** Biochemical validation of metabolite concentrations in wild type and mutant in response to nutrient replete and limited conditions.

**Supplementary Figure 7.** Relative changes in lipid composition of wild type and mutant strains determined from UHPLC-MS analysis in positive electrospray ionization mode.

**Supplementary Figure 8.** Correlation plots of the lipid:amide I ratio or carbohydrate:amide I ratio values determined from FT-IR spectra and the corresponding neutral lipid or starch concentration values determined by biochemical quantification.

**Supplementary Table 1.** *Chlamydomonas reinhardtii* strains used in this study.

**Supplementary Table 2.** Matched identifications for each significant lipid peak based on PC and DF loading values derived from PCA and PC-DFA of UHPLC-MS analysis of wild type and mutant strains in response to P limitation.

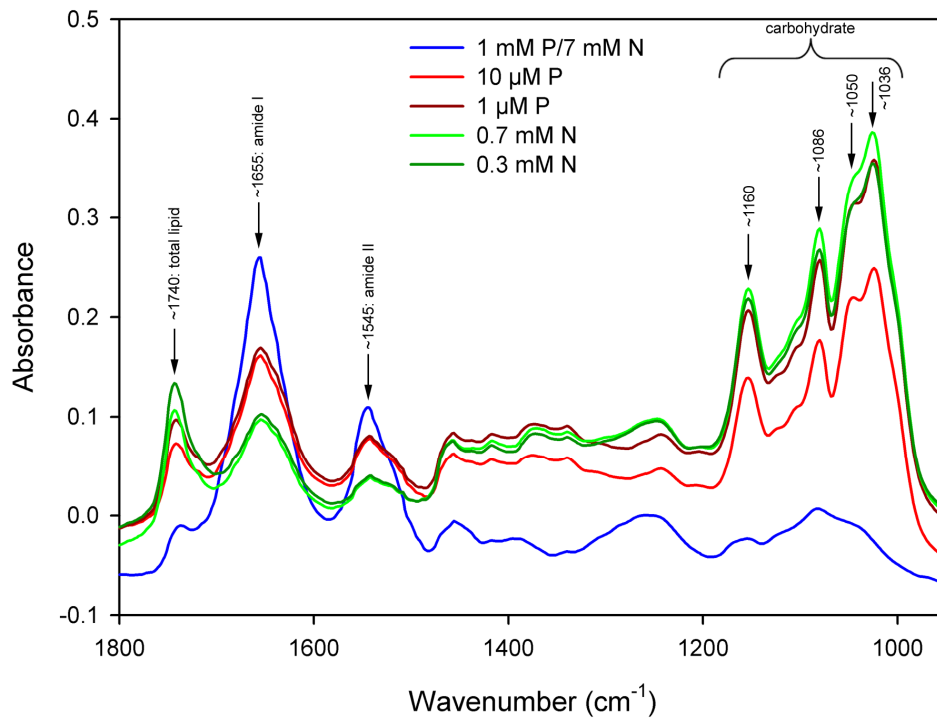

**Supplementary Fig. 1** Representative FT-IR spectra in the range of 1780–950 cm<sup>-1</sup> (EMSC-corrected) from wild type *Chlamydomonas reinhardtii* cultured in high P and N (1 mM P, 7 mM N), and limiting concentrations of P (10 and 1 μM P) and N (0.7 and 0.3 mM N) at day-7. Major lipid, carbohydrate and protein bands are indicated

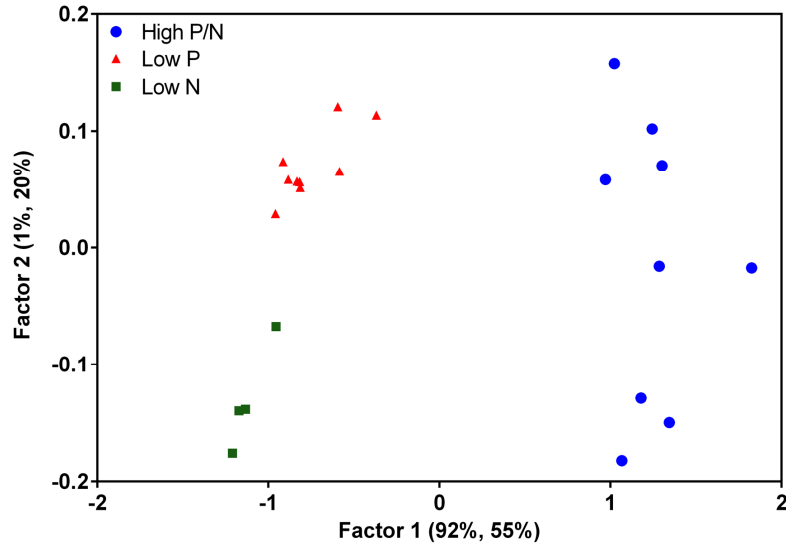

**Supplementary Fig. 2** PLS scores plot of FT-IR spectra ( $1780\text{--}950\text{ cm}^{-1}$ ) derived from wild type cells cultured in nutrient replete (high P/N, 1 mM P, 7 mM N) conditions in comparison to cells cultured in response to P limitation (low P, 10  $\mu\text{M}$  P) and N limitation (low N, 0.7 mM N) at day-7 of growth. Each symbol represents the average of 3 technical replicates per biological sample. Different colours/symbols represent different nutrient conditions. Plot based on 9 biological replicates for high P/N and low P, and 5 biological replicates for low N

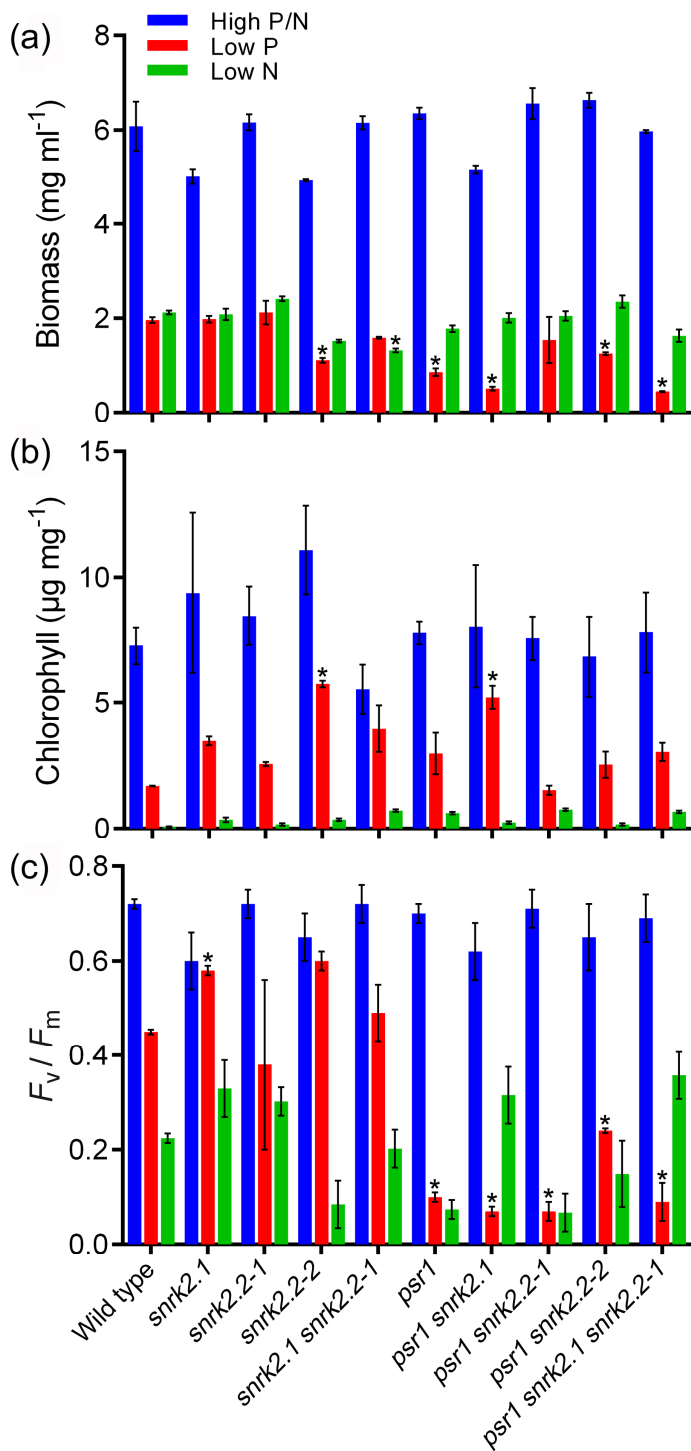

**Supplementary Fig. 3** Physiological responses of wild type and mutant strains in response to P and N limitation. **a – c** Fresh weight biomass (**a**), total chlorophyll concentration (**b**) and chlorophyll fluorescence ( $F_v/F_m$  ratio) (**c**) of wild type and mutant strains under P and N limitation (low P, 10  $\mu$ M P and low N, 0.7 mM N) in comparison to nutrient replete (high P/N, 1 mM P and 7 mM N) conditions at day 7 of growth. All data points are means  $\pm$ SE of 3 biological replicates. Asterisks denote significant difference compared to wild type strains

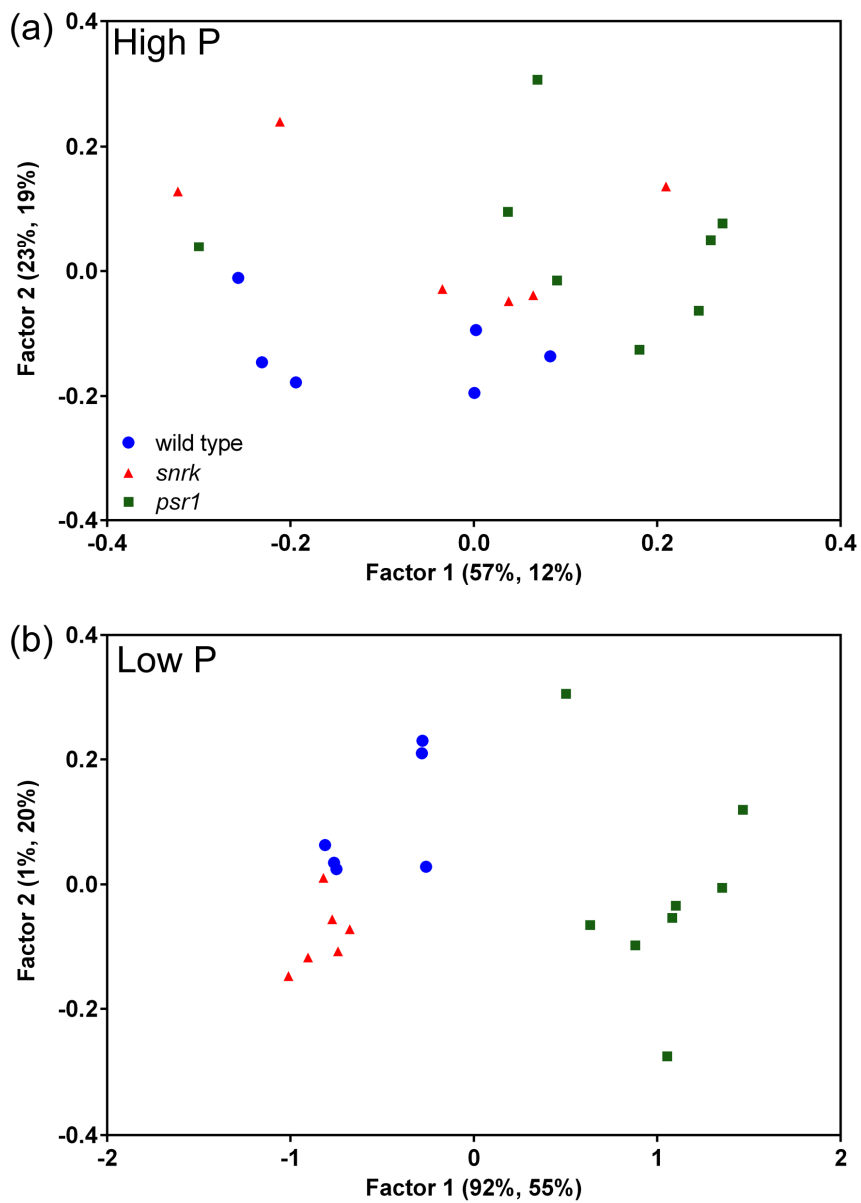

**Supplementary Fig. 4** PLS scores plot of FT-IR spectra ( $1780\text{--}950\text{ cm}^{-1}$ ) derived from wild type, *snrk2.1* and/or *snrk2.2* mutants (*snrk* type strains) and *psr1*-containing mutants (*psr1* type strains). **a** and **b** Strains cultured in P replete (high P, 1 mM P) conditions (**a**) or P limitation (low P, 10  $\mu\text{M}$  P) conditions (**b**) at day 7 of growth. The spectra deriving from 6 wild type replicates, 6 *snrk* replicates and 8 *psr1* replicates were used as training data to generate PLS-DA linear regression models. Each symbol represents the average of 3 technical replicates per biological sample

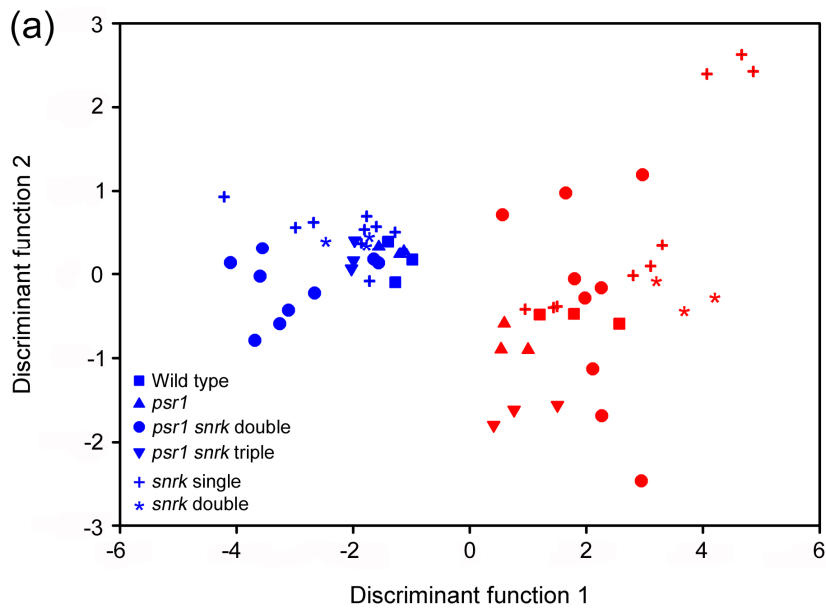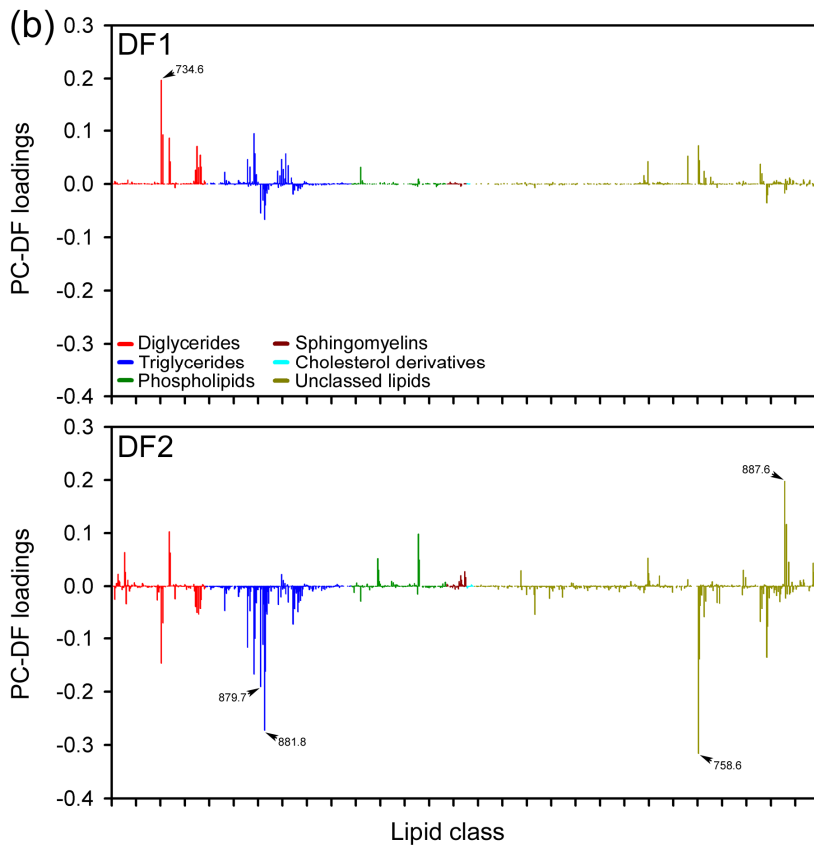

**Supplementary Fig. 5** LC-MS analysis of wild type and mutant strains in response to P limitation. **a** PC-discriminant function analysis (PC-DFA) of UHPLC-MS spectra (positive electrospray ion mode) derived from wild type and mutant strains cultured in replete concentrations of P (1 mM), indicated by blue symbols, and in limited concentrations of P (10 μM), indicated by red symbols. Different symbols represent the different wild type and mutant strains. For this plot all *snrk2.1* and *snrk2.2* mutants have been categorized as '*snrk*'. **b** PC-DFA loading plots of DF1 and DF2. Peaks have been categorized into one of five lipid classes as indicated by peak colour, and within each class are arranged in ascending *m/z* value. Multiple phospholipid types (described in Supplemental Fig. 7) are grouped together as phospholipids. Peaks with a loading value greater than 0.2 are highlighted and *m/z* value indicated. Lipid peak definitions are shown in Supplemental Table 2

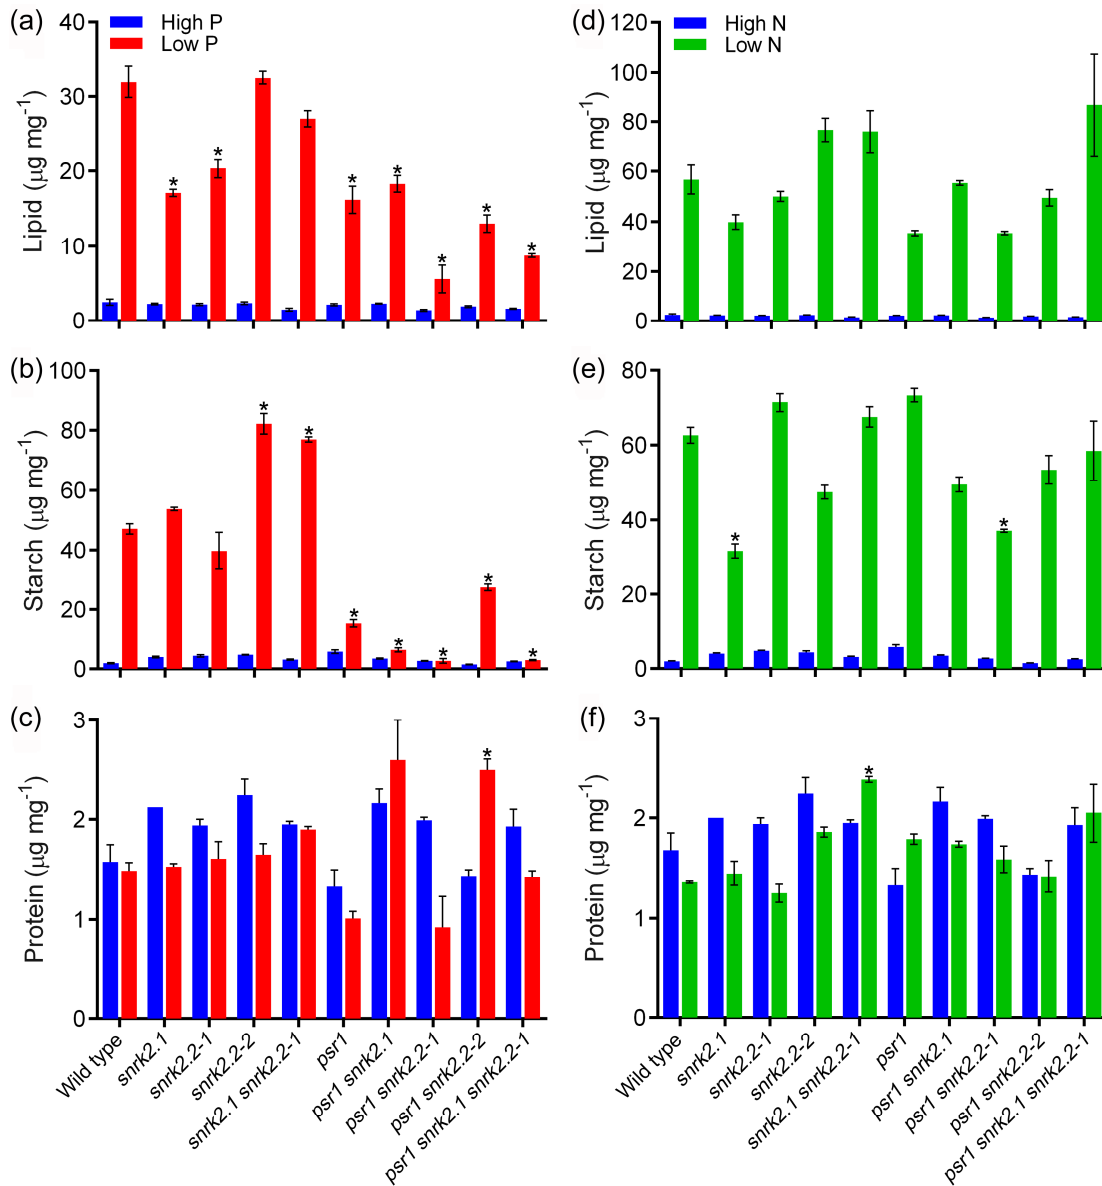

**Supplementary Fig. 6** Biochemical validation of metabolite concentrations in wild type and mutants in response to nutrient replete and limited conditions. **a – f** Neutral lipid (**a, d**), starch (**b, e**) and protein (**c, f**) concentration of wild type and mutant lines, determined at day 7 in response to nutrient replete treatments (1 mM P, high P and 7 mM N, high N) and nutrient limitation treatment, either low P (10  $\mu$ M P) (**a – c**) or low N (0.7 mM N) (**d – f**). All data points are means  $\pm$ SE of at least 3 biological and 3 technical replicates. Lipids were determined using Nile Red quantification, starch was determined using a Total Starch Assay kit (Megazyme) using the manufacturer's specifications and protein using the Bradford assay

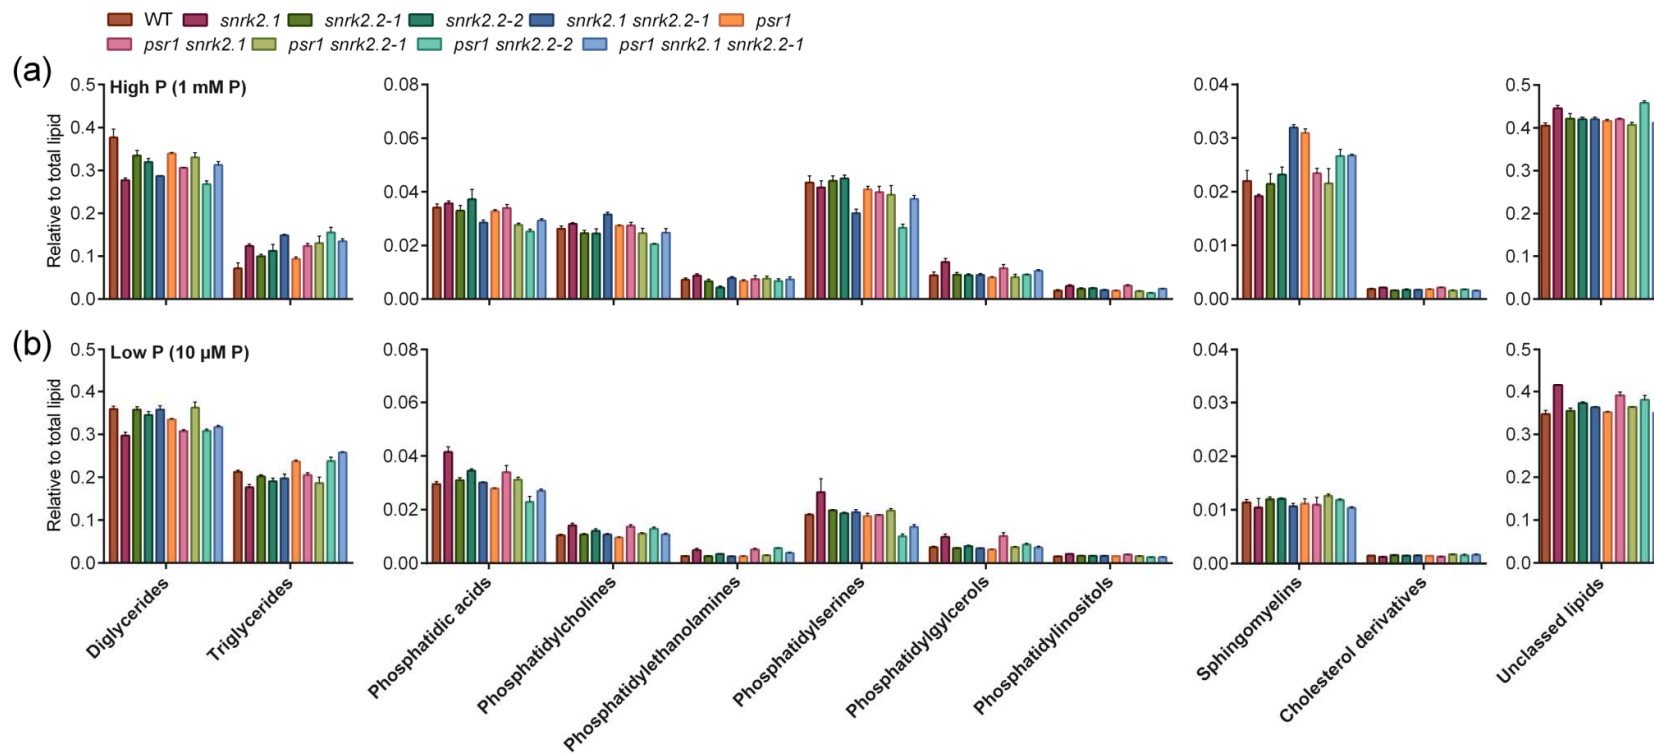

**Supplementary Fig. 7** Relative changes in lipid composition of wild type and mutant strains determined from positive ionization mode UHPLC-MS. **a** and **b** Lipid composition in strains grown under P replete (1 mM P) (**a**) and P limitation (10  $\mu$ M P) (**b**) conditions. Data are means  $\pm$ SE derived from at least 3 replicate spectra which have been normalized on the basis of fresh weight biomass



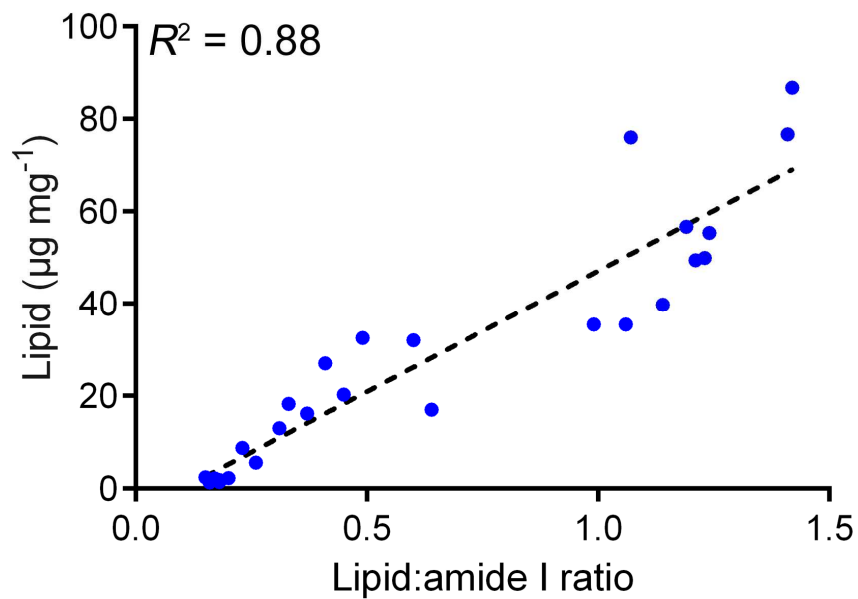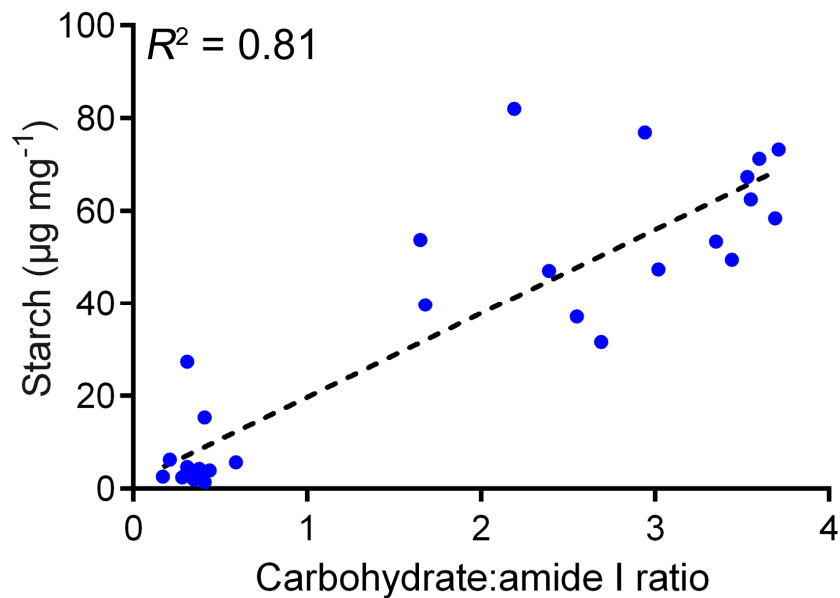

**Supplementary Fig. 8** Correlation plots of the lipid/amide I ratio or carbohydrate/amide I ratio values determined from FT-IR spectra and the corresponding neutral lipid or starch concentration values determined by biochemical quantification. Lipids were determined using Nile Red quantification. Starch was determined using a Total Starch Assay kit (Megazyme) using the manufacturer's specifications. Data are from wild type and mutant strains and from all nutrient treatments. Each data point is a mean value ( $\pm$ SE) of at least three biological and three technical replicates

**Supplementary Table 1** *Chlamydomonas reinhardtii* strains used in this study

| Strain ID <sup>a</sup> | Name                                              | Genotype                                         | Source                                   | Reference <sup>b</sup>    |
|------------------------|---------------------------------------------------|--------------------------------------------------|------------------------------------------|---------------------------|
| CC125<br>(CCAP11/32C)  | Wild type                                         | <i>nit1nit2cw+mt+</i>                            | Culture Collection of Algae and Protozoa | (Pröschold et al. 2005)   |
| CC4267                 | <i>psr1</i>                                       | <i>psr1-1cw+nit-mt-</i>                          | Arthur Grossman (Carnegie Institution)   | (Shimogawara et al. 1999) |
| CC4275                 | <i>snrk2.1</i>                                    | <i>snrk2.1(ars11)cw+nit+</i>                     | Chlamydomonas Resource Center            | (Moseley et al. 2009)     |
| CC4270                 | <i>snrk2.2-1</i>                                  | <i>snrk2.2(are10)cw+nit+mt+</i>                  | Chlamydomonas Resource Center            | (Davies et al. 1999)      |
| CC4273                 | <i>snrk2.2-2</i>                                  | <i>snrk2.2(are16)cw+nit+</i>                     | Chlamydomonas Resource Center            | (Moseley et al. 2009)     |
| CC4281                 | <i>snrk2.1</i><br><i>snrk2.2-2</i>                | <i>snrk2.1(ars11)snrk2.2(are16)</i>              | Chlamydomonas Resource Center            | (Moseley et al. 2009)     |
| CC4276                 | <i>psr1</i><br><i>snrk2.1</i>                     | <i>psr1-1snrk2.1(ars11)cw+nit+</i>               | Chlamydomonas Resource Center            | (Moseley et al. 2009)     |
| CC4272                 | <i>psr1</i><br><i>snrk2.2-1</i>                   | <i>psr1-1snrk2.2(are10)cw+nit+</i>               | Chlamydomonas Resource Center            | (Moseley et al. 2009)     |
| CC4274                 | <i>psr1</i><br><i>snrk2.2-2</i>                   | <i>psr1-1snrk2.2(are16)cw+</i>                   | Chlamydomonas Resource Center            | (Moseley et al. 2009)     |
| CC4278                 | <i>psr1</i><br><i>snrk2.1</i><br><i>snrk2.2-1</i> | <i>psr1-1snrk2.1(ars11)snrk2.2(are10)cw+nit+</i> | Chlamydomonas Resource Center            | (Moseley et al. 2009)     |

<sup>a</sup>Chlamydomonas Resource Center, USA strain ID number is used.

<sup>b</sup>References:

Davies, J. P., F. H. Yildiz, A. R. Grossman (1999). Sac3, an Snf1-like serine/threonine kinase that positively and negatively regulates the responses of *Chlamydomonas* to sulfur limitation. *Plant Cell* 11, 1179-1190

Moseley, J. L., D. Gonzalez-Ballester, W. Pootakham, S. Bailey, A. R. Grossman (2009). Genetic interactions between regulators of *Chlamydomonas* phosphorus and sulfur deprivation responses. *Genetics* 181, 889-905

Pröschold, T., E. H. Harris, A. W. Coleman (2005). Portrait of a species: *Chlamydomonas reinhardtii*. *Genetics* 170, 1601-1610

Shimogawara, K., D. D. Wykoff, H. Usuda, A. R. Grossman (1999). *Chlamydomonas reinhardtii* mutants abnormal in their responses to phosphorus deprivation. *Plant Physiology* 120, 685-693

**Supplementary Table 2** Matched identifications for each significant lipid peak (in bold) based on PC1 and 2 loadings (Fig. 6b) and DF1 and 2 loadings (Supplemental Fig. 5b) derived from PCA and PC-DFA of UHPLC-MS analysis of wild type and mutant strains in response to P limitation. Lipid class definitions: GL02, diglycerides; GL03, triglycerides; GP00, phosphatidic acids; GP03, phosphatidylethanolamines; UN, unclassified lipids

| idx  | m/z    | Lipid Class | PC1 Loading  | PC2 Loading   | DFA1 Loading | DFA2 Loading  | Putatively assigned lipid identifications by accurate mass match with databases: HMDB, METLIN or KEGG            |
|------|--------|-------------|--------------|---------------|--------------|---------------|------------------------------------------------------------------------------------------------------------------|
| 1256 | 599.41 | GL02        | 0.015        | <b>0.109</b>  | -0.001       | 0.023         | Diglycerols                                                                                                      |
| 1412 | 669.45 | GP00        | 0.032        | <b>0.112</b>  | 0.000        | 0.006         | Glycerophosphates                                                                                                |
| 1608 | 734.59 | GL02        | <b>0.580</b> | <b>0.178</b>  | <b>0.197</b> | <b>-0.147</b> | DGTS (16:0/16:0)                                                                                                 |
| 1611 | 735.59 | GL02        | <b>0.276</b> | 0.093         | 0.093        | -0.071        | DGTS (16:0/16:0)                                                                                                 |
| 1615 | 737.61 | UN          | <b>0.119</b> | -0.032        | 0.052        | 0.013         | Cyclic archaeol with two cyclopentane rings or diglycerols                                                       |
| 1678 | 756.57 | GL02        | <b>0.183</b> | <b>0.213</b>  | 0.086        | <b>0.103</b>  | DGTS (16:0/16:0)                                                                                                 |
| 1680 | 757.58 | GL02        | 0.082        | <b>0.103</b>  | 0.042        | 0.063         | DGTS (16:0/16:0)                                                                                                 |
| 1682 | 758.59 | UN          | <b>0.344</b> | <b>-0.141</b> | 0.072        | <b>-0.316</b> | 1-Octadecanoyl-2-(9Z,1Z-octadecadienoyl)-3-O-[(N,N,N-trimethyl) homoserine]-glycerol or DGTS (16:0/18:2(9Z,12Z)) |
| 1684 | 759.59 | UN          | <b>0.178</b> | -0.075        | 0.044        | -0.139        | 1-Octadecanoyl-2-(9Z,1Z-octadecadienoyl)-3-O-[(N,N,N-trimethyl) homoserine]-glycerol or DGTS (16:0/18:2(9Z,12Z)) |
| 1687 | 761.61 | GP00        | <b>0.114</b> | 0.053         | 0.032        | -0.029        | Glycerophosphates                                                                                                |
| 1717 | 769.48 | UN          | <b>0.143</b> | 0.090         | 0.024        | -0.060        | monoglycerols or diglycerols                                                                                     |
| 1756 | 776.54 | GP03        | -0.018       | <b>0.105</b>  | 0.009        | 0.098         | Glycerophosphoserines                                                                                            |
| 2025 | 845.66 | UN          | <b>0.107</b> | -0.096        | 0.038        | -0.068        | beta-hydroarchaetidylglycerol; diglycerol or triglycerol                                                         |
| 2035 | 847.68 | GL02        | <b>0.178</b> | <b>-0.123</b> | 0.071        | -0.051        | Diglycerols or possible triglycerols                                                                             |
| 2074 | 855.74 | UN          | -0.005       | 0.029         | -0.035       | <b>-0.135</b> | Galactosylceramide, Glucosylceramide or short chained triglycerols                                               |
| 2193 | 871.68 | GL03        | <b>0.176</b> | -0.039        | 0.046        | <b>-0.117</b> | Triglycerols                                                                                                     |
| 2199 | 872.68 | GL03        | <b>0.105</b> | -0.024        | 0.032        | -0.048        | Triglycerols                                                                                                     |
| 2208 | 873.69 | GL02        | <b>0.150</b> | -0.039        | 0.054        | -0.042        | DGTS (24:1/24:0) or possible triglycerol                                                                         |
| 2220 | 875.71 | GL03        | <b>0.306</b> | <b>-0.142</b> | 0.095        | <b>-0.167</b> | Triglycerols                                                                                                     |
| 2224 | 876.71 | GL03        | <b>0.184</b> | -0.085        | 0.057        | <b>-0.100</b> | Triglycerols                                                                                                     |
| 2244 | 879.74 | GL03        | -0.013       | 0.059         | -0.055       | <b>-0.190</b> | Triglycerols                                                                                                     |
| 2252 | 880.74 | GL03        | -0.005       | 0.035         | -0.031       | <b>-0.111</b> | Triglycerols                                                                                                     |
| 2259 | 881.76 | GL03        | -0.004       | 0.033         | -0.066       | <b>-0.272</b> | Triglycerols                                                                                                     |
| 2264 | 882.76 | GL03        | -0.003       | 0.020         | -0.039       | <b>-0.162</b> | Triglycerols                                                                                                     |
| 2298 | 887.57 | UN          | -0.004       | <b>0.639</b>  | -0.017       | <b>0.198</b>  | Glycerophosphoinositols; alpha, alpha'-Trehalose 6-mycolate or unclassified lipids                               |
| 2301 | 888.57 | UN          | -0.001       | <b>0.383</b>  | -0.010       | <b>0.116</b>  | Glycerophosphoinositols; alpha, alpha'-Trehalose 6-mycolate or unclassified lipids                               |
| 2306 | 889.57 | UN          | 0.001        | <b>0.122</b>  | -0.001       | 0.045         | Glycerophosphoinositols; alpha, alpha'-Trehalose 6-mycolate or unclassified lipids                               |
| 2393 | 901.72 | GL03        | <b>0.124</b> | -0.068        | 0.057        | -0.014        | Triglycerols                                                                                                     |
| 2671 | 953.54 | UN          | 0.027        | <b>0.221</b>  | -0.004       | 0.044         | Glycerophosphoinositols or unclassified lipids                                                                   |
| 2676 | 954.54 | UN          | 0.017        | <b>0.137</b>  | -0.002       | 0.026         | Glycerophosphoinositols or unclassified lipids                                                                   |
